# Supplementary material for: Continuous and ultrathin platinum films on graphene using atomic layer deposition: a combined computational and experimental study
Source: Royal Society of Chemistry journal article supplement (doi:10.1039/c6nr07483a), 2016-01-01
Supplement: c6nr07483a1.pdf [file c6nr07483a1.pdf]

## SUPPORTING INFORMATION

### Continuous and Ultrathin Platinum Films on Graphene using Atomic Layer Deposition: A Combined Computational and Experimental Study

Bora Karasulu, René H. J. Vervuurt, Wilhelmus M. M. Kessels and Ageeth A. Bol

*Eindhoven University of Technology, Department of Applied Physics,  
P.O. Box 513, 5600 MB Eindhoven, The Netherlands*

[b.karasulu@tue.nl](mailto:b.karasulu@tue.nl)

### Supporting Figures (Figure S1-S7)

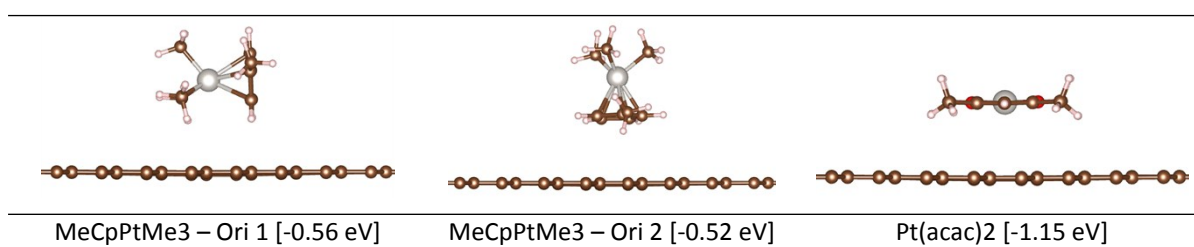

**Figure S1.** Different physisorption orientations of MeCpPtMe<sub>3</sub> and Pt(acac)<sub>2</sub> on pristine graphene [and associated binding energies] as predicted at the PBE-D3 level of theory.

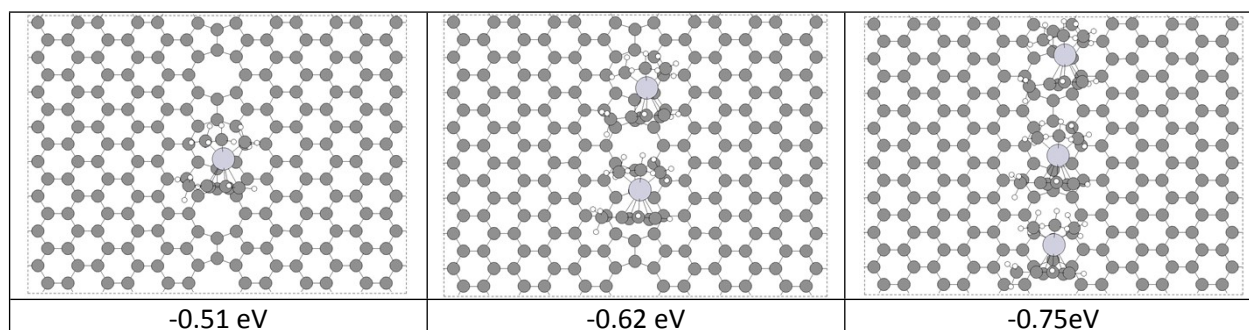

**Figure S2.** Binding of multiple MeCpPtMe<sub>3</sub> precursor molecules on graphene with grain boundaries.

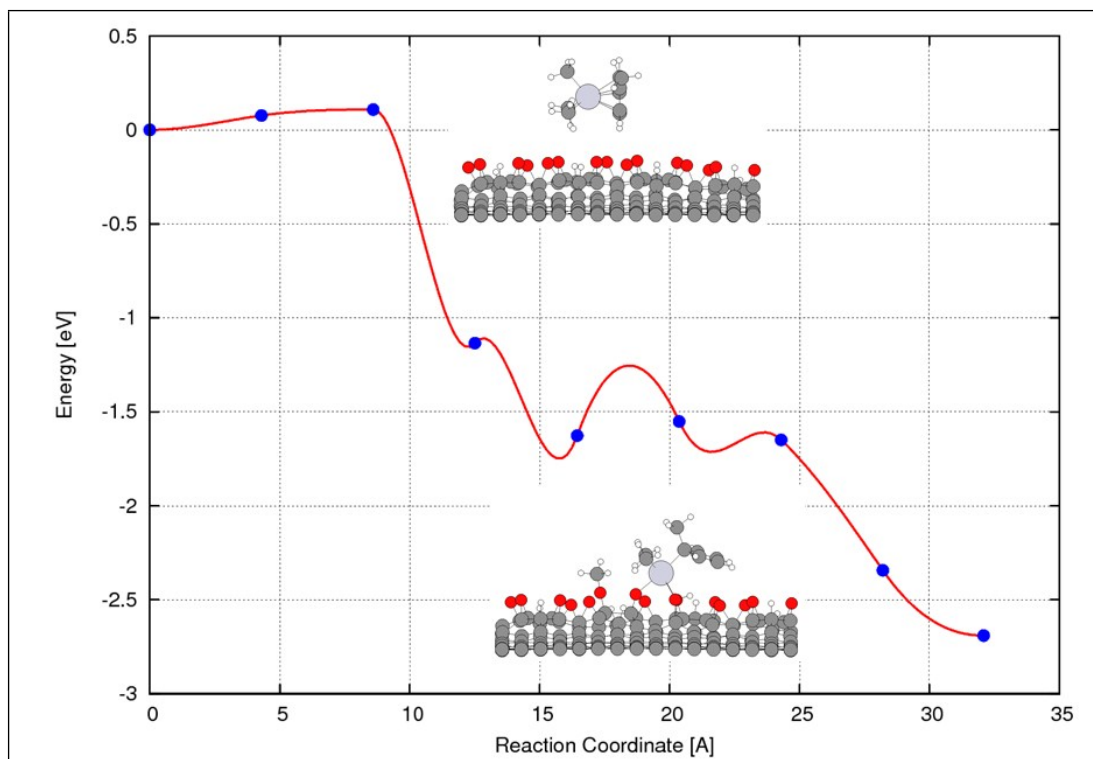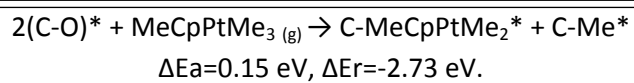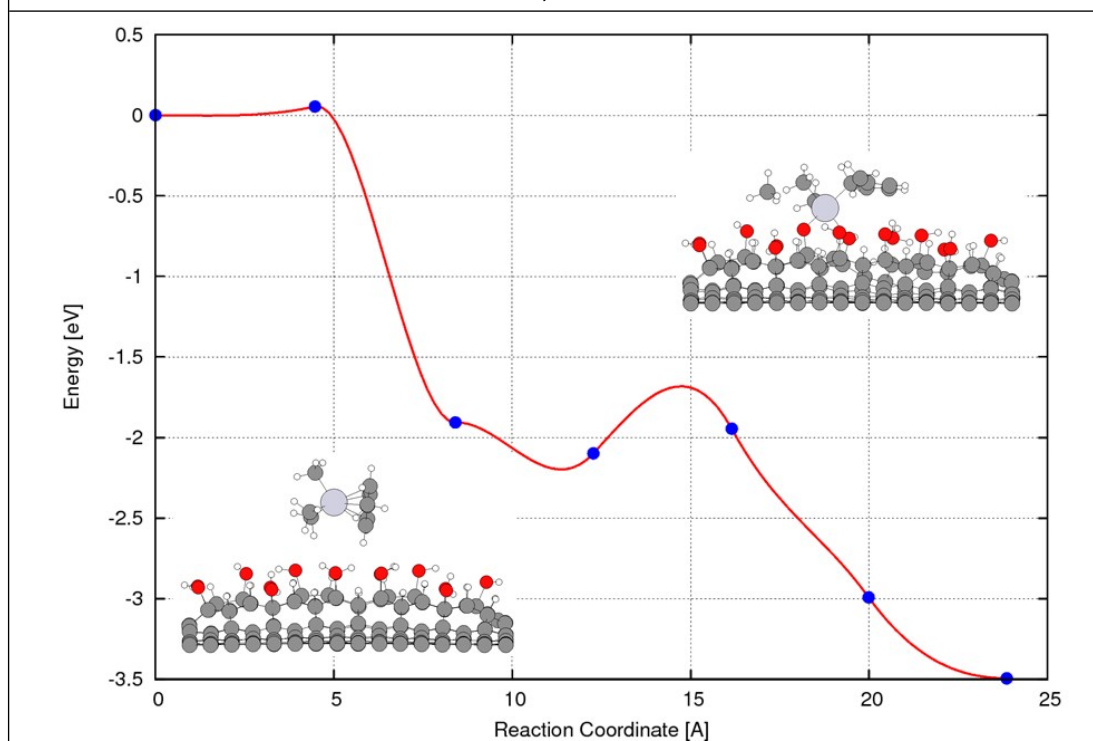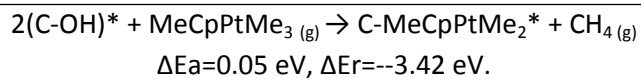

**Figure S3.** PBE-D3 level energetics (from CI-NEB computations) corresponding to MeCpPtMe<sub>3</sub> binding on graphene with (top) epoxydated and (bottom) hydroxylated grain boundaries. Here, the first points (physisorbed species) are (top) -0.40 eV and (bottom) -0.49 eV with respect to the respective separated species (MeCpPtMe<sub>3</sub> and graphene).

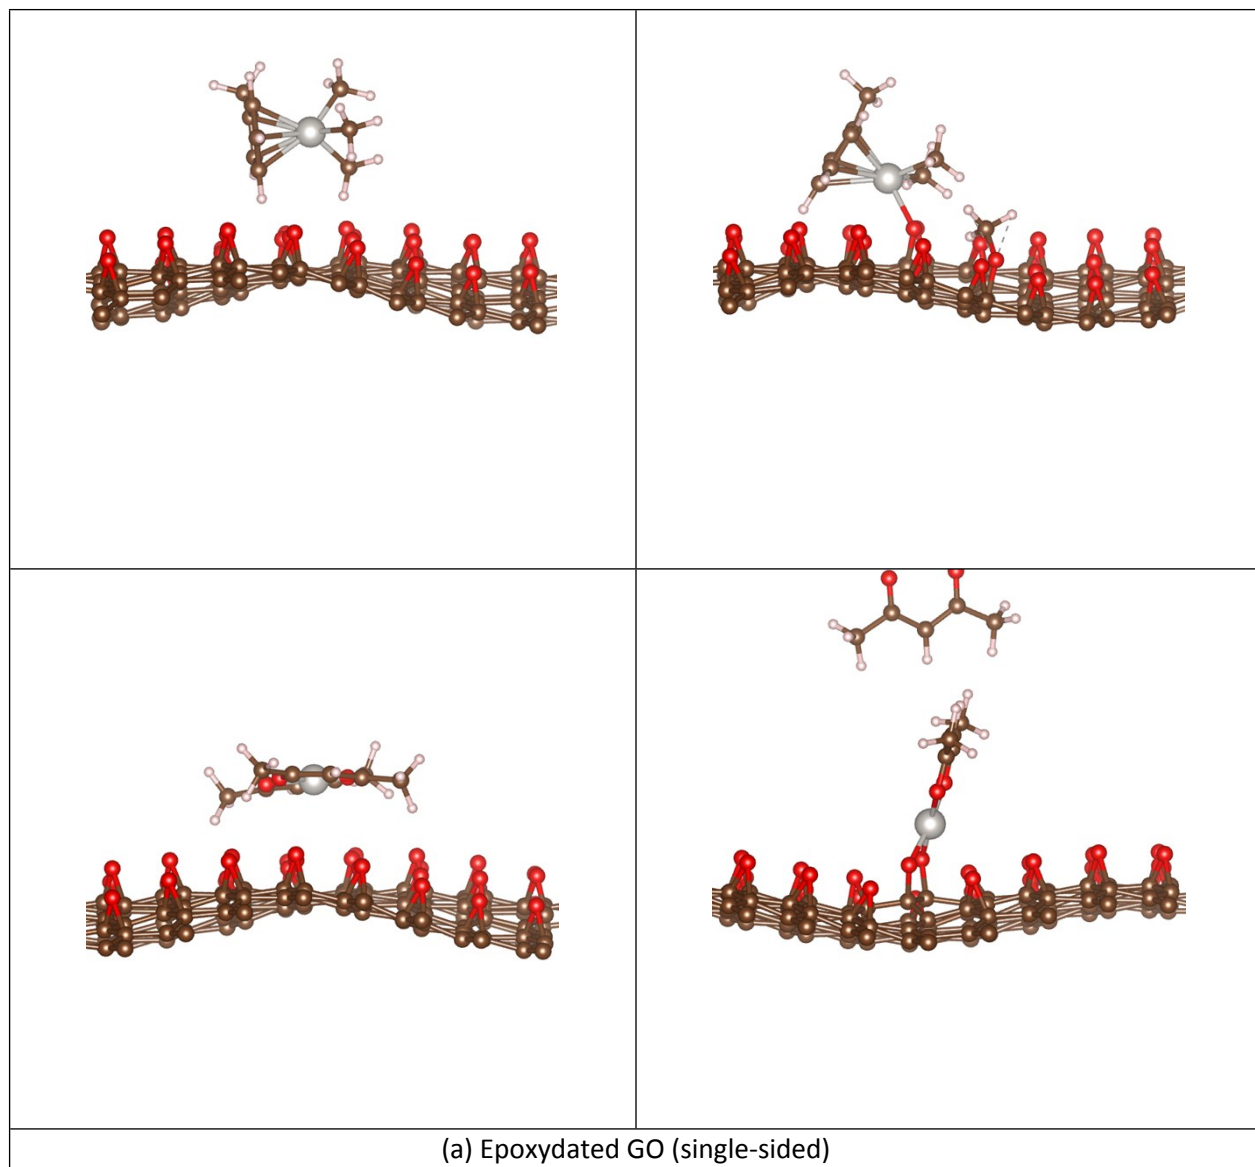

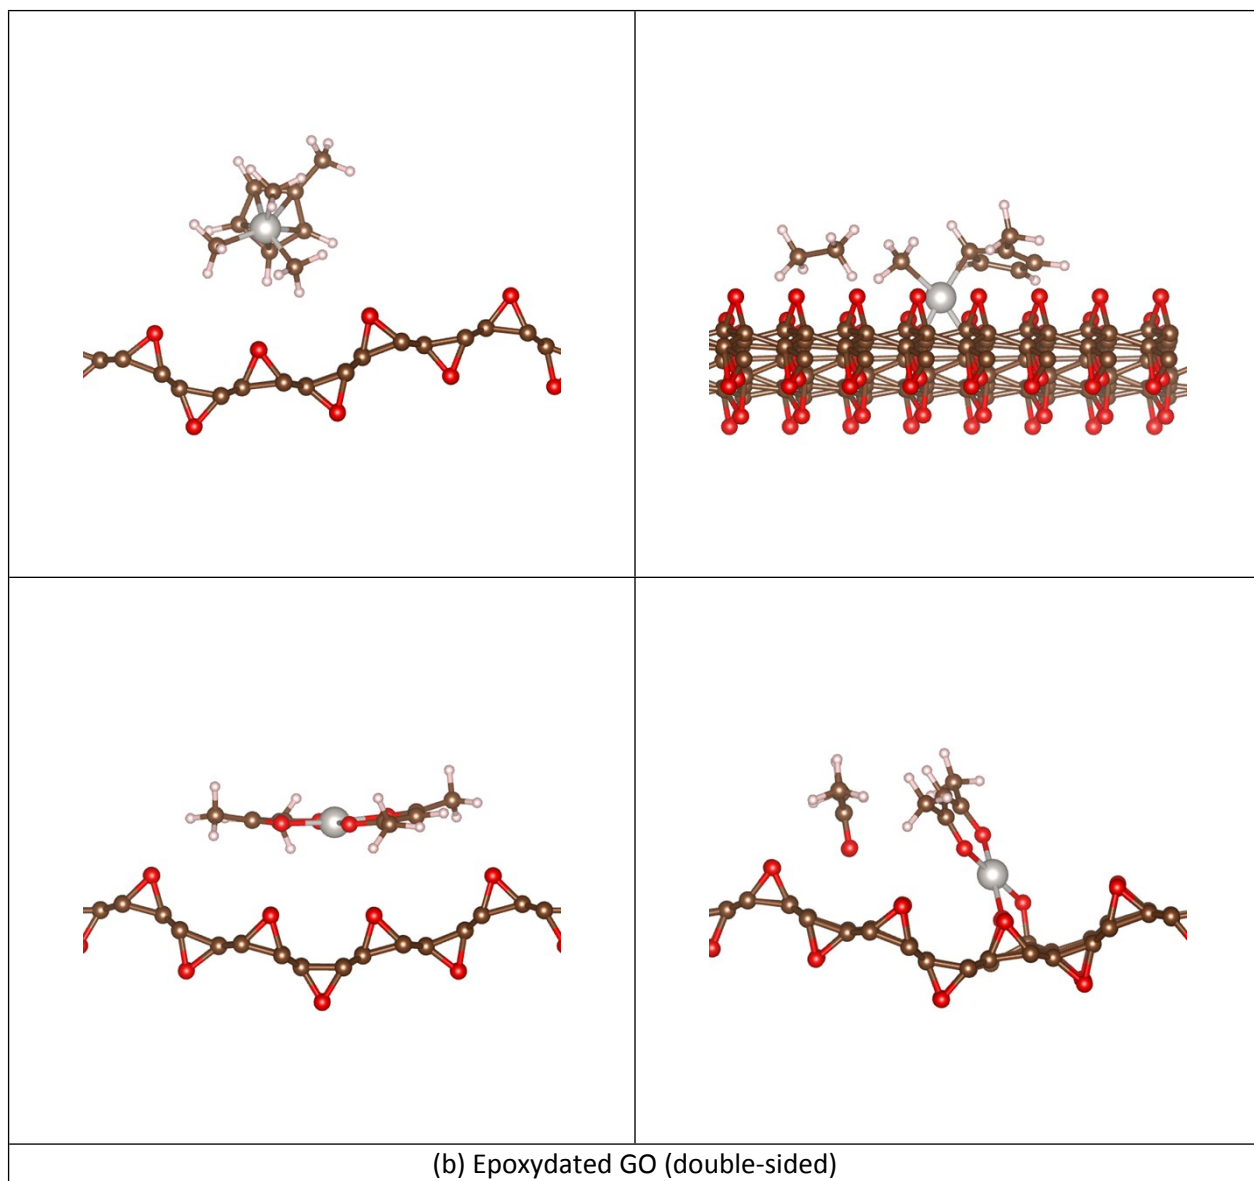

(b) Epoxydated GO (double-sided)

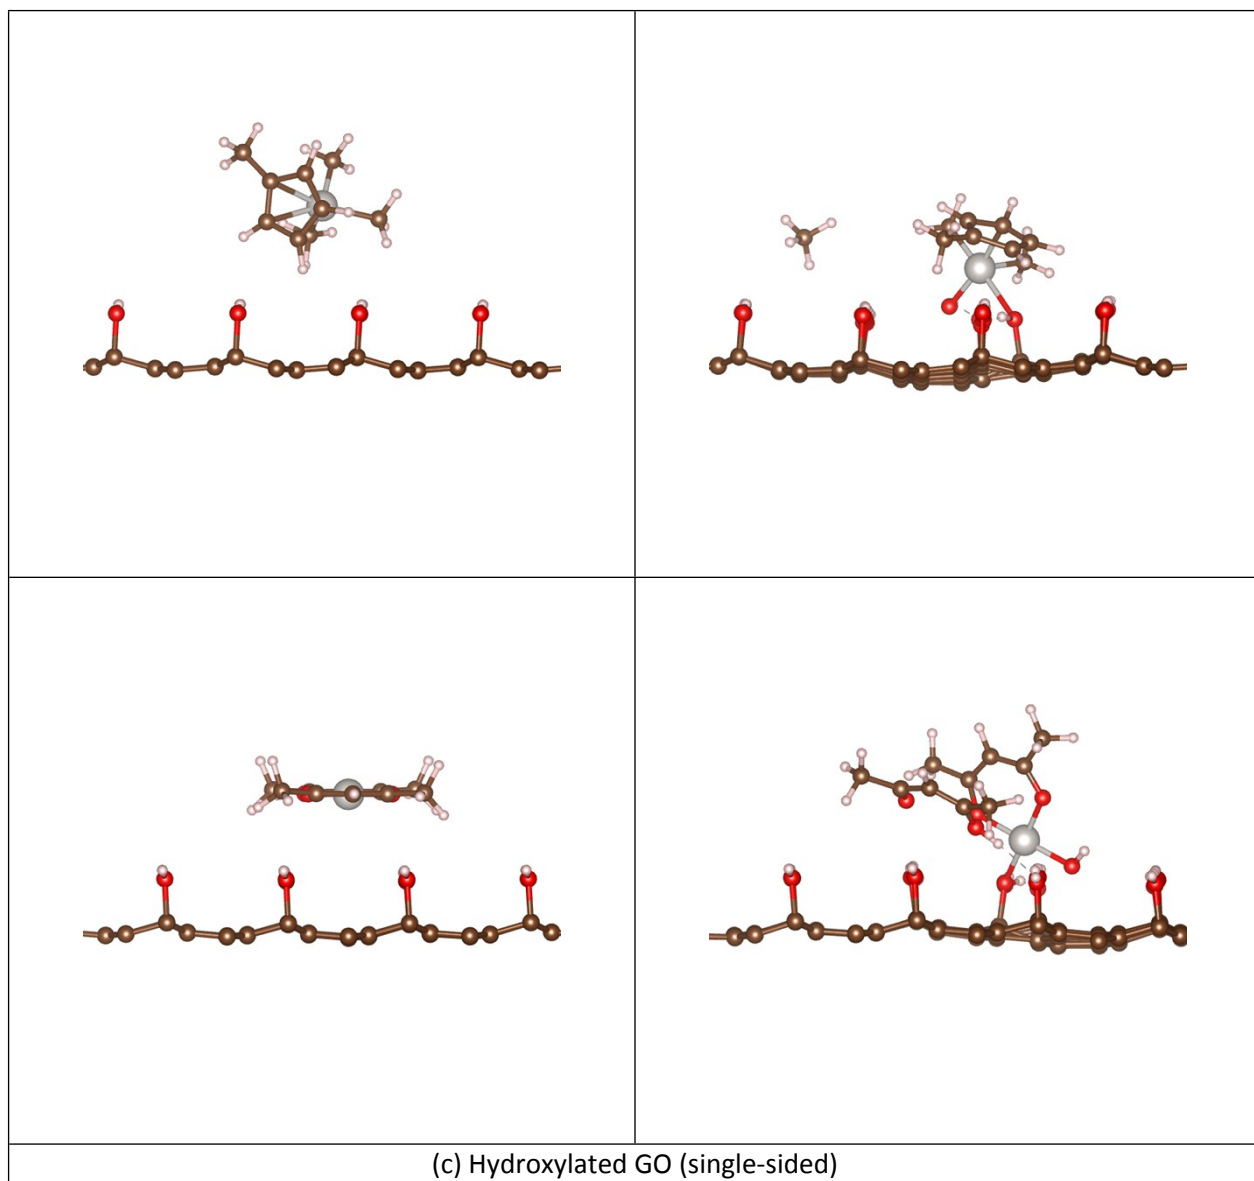

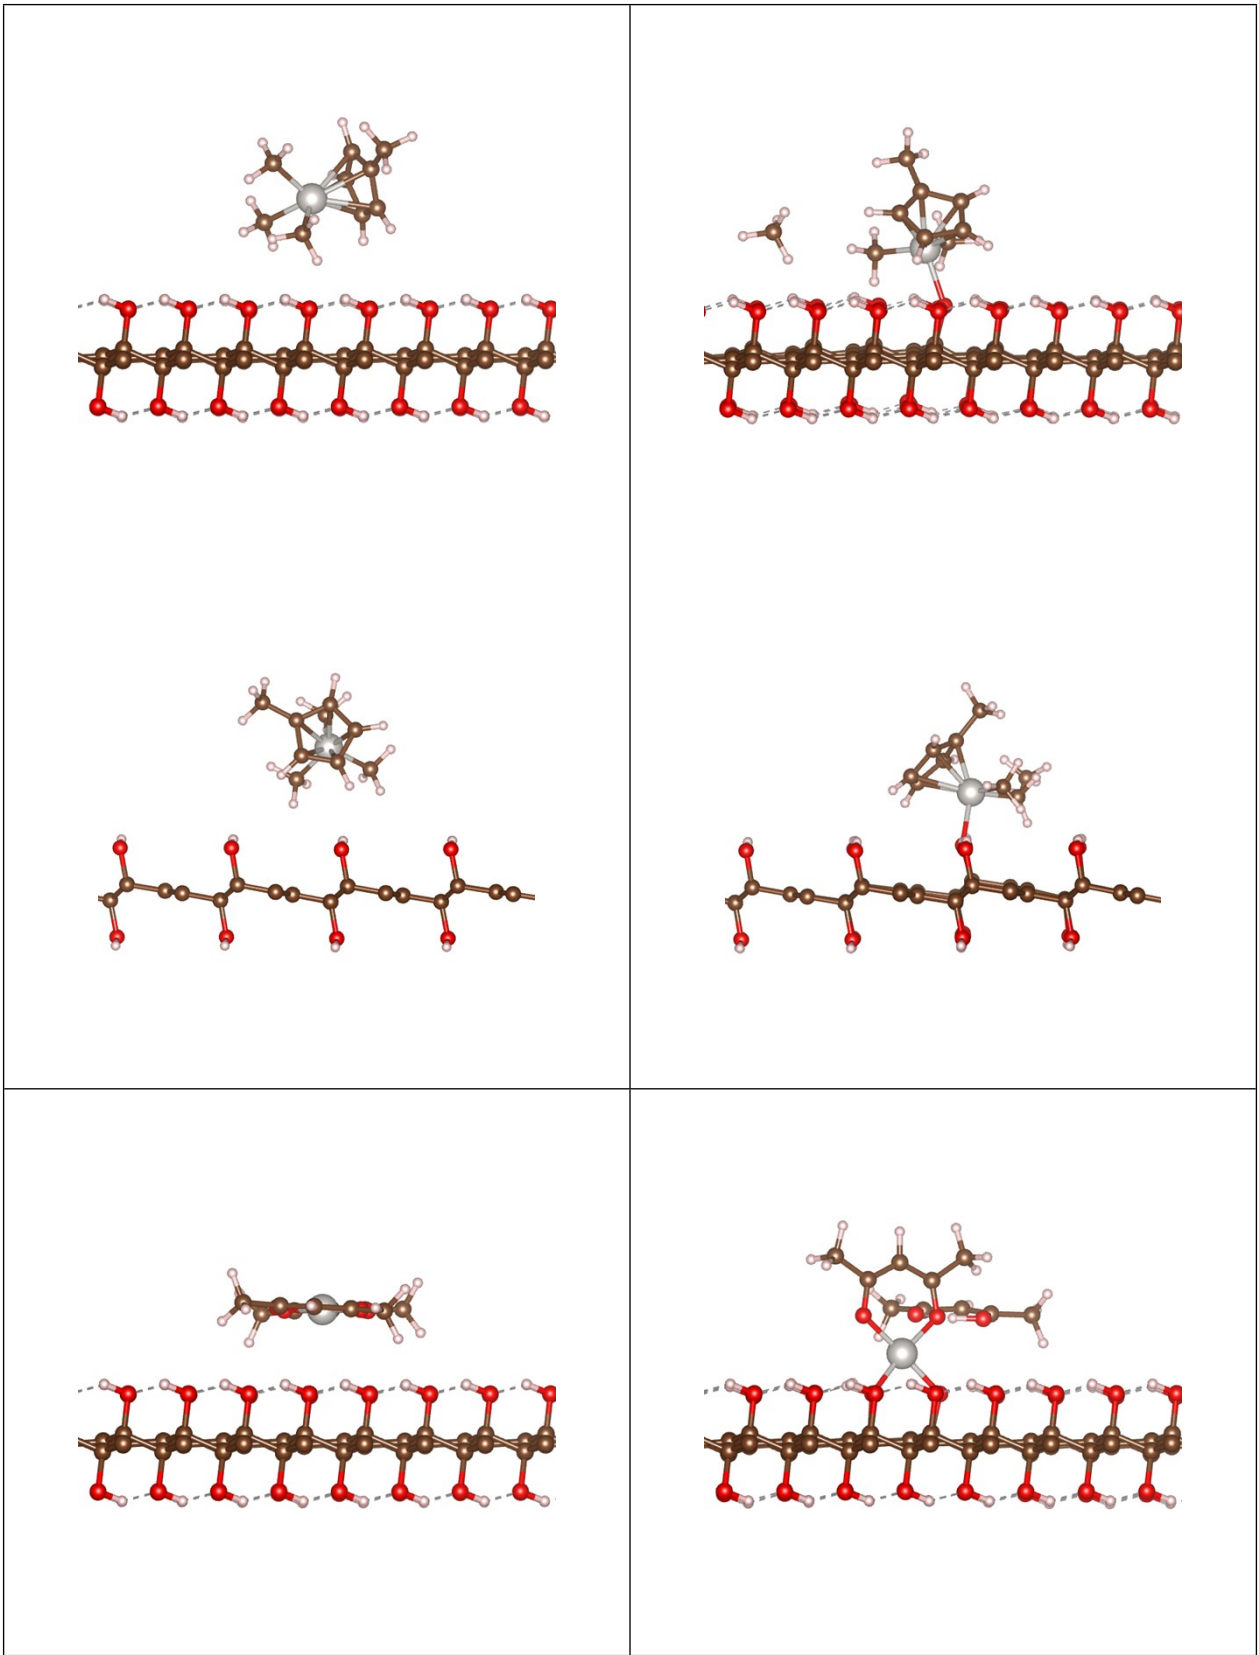

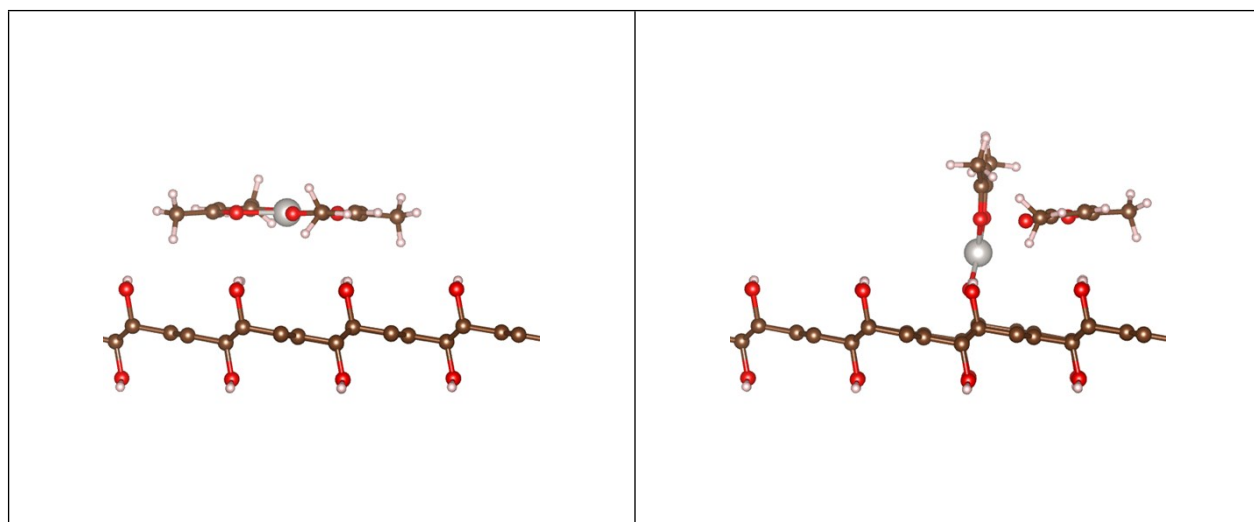

(d) Hydroxylated GO (double-sided)

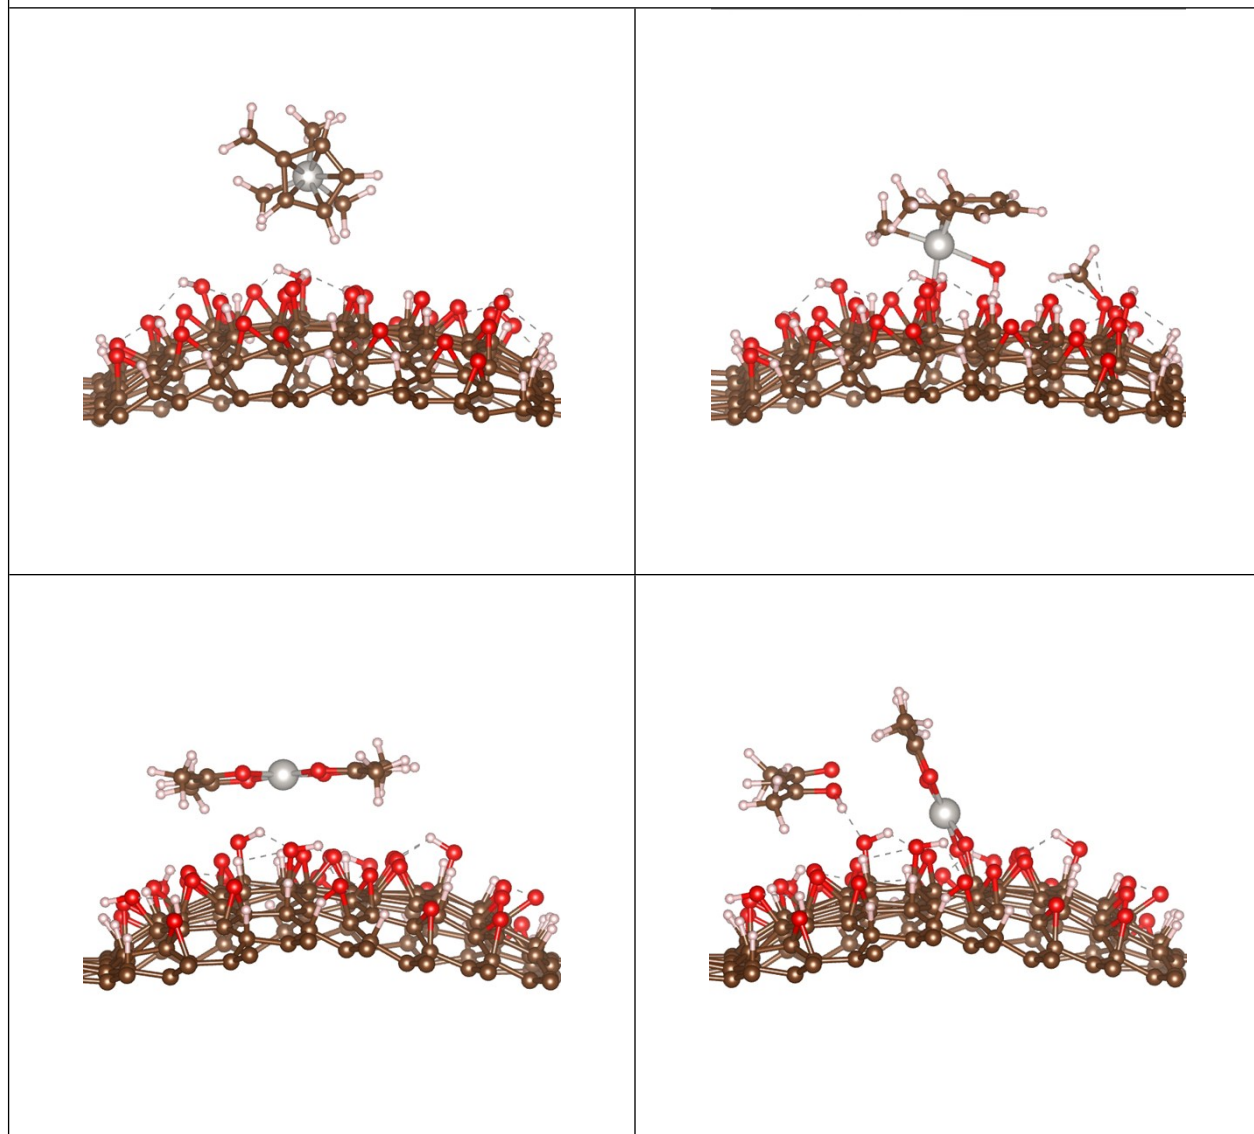



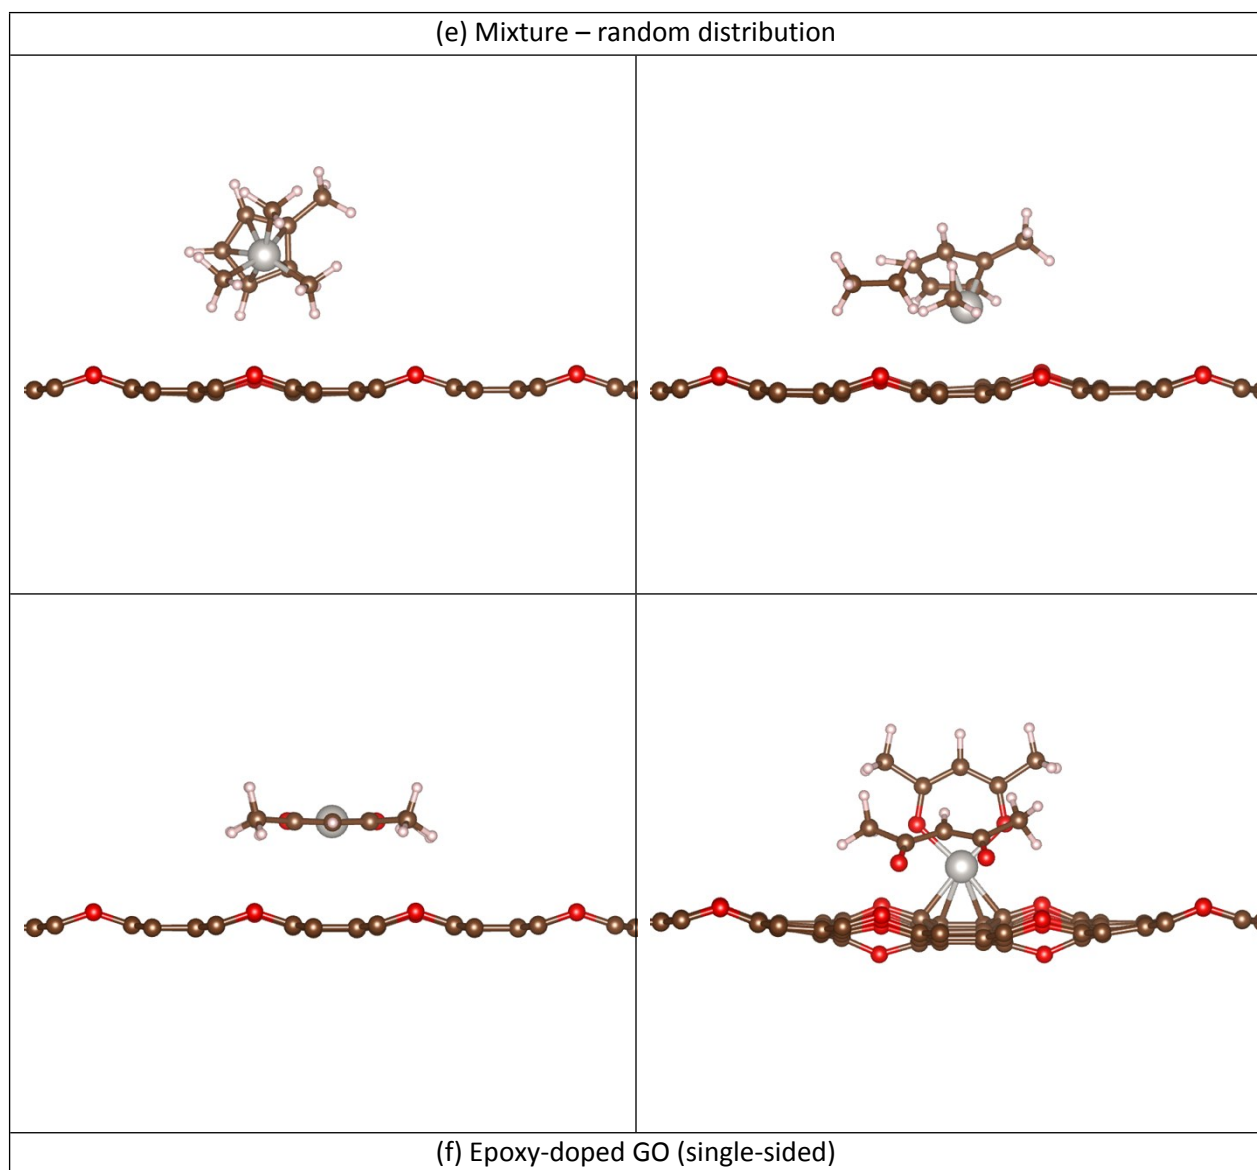

**Figure S4.** Ball-and-stick representation of the lowest-energy (left) physisorbed and (right) chemisorbed species of MeCpPtMe<sub>3</sub> and Pt(acac)<sub>2</sub> on selected graphene oxide models considered in current DFT calculations. Relative chemisorption energies are given in brackets. Color code, C: brown; O: red; H: pink-white; Pt: Gray.



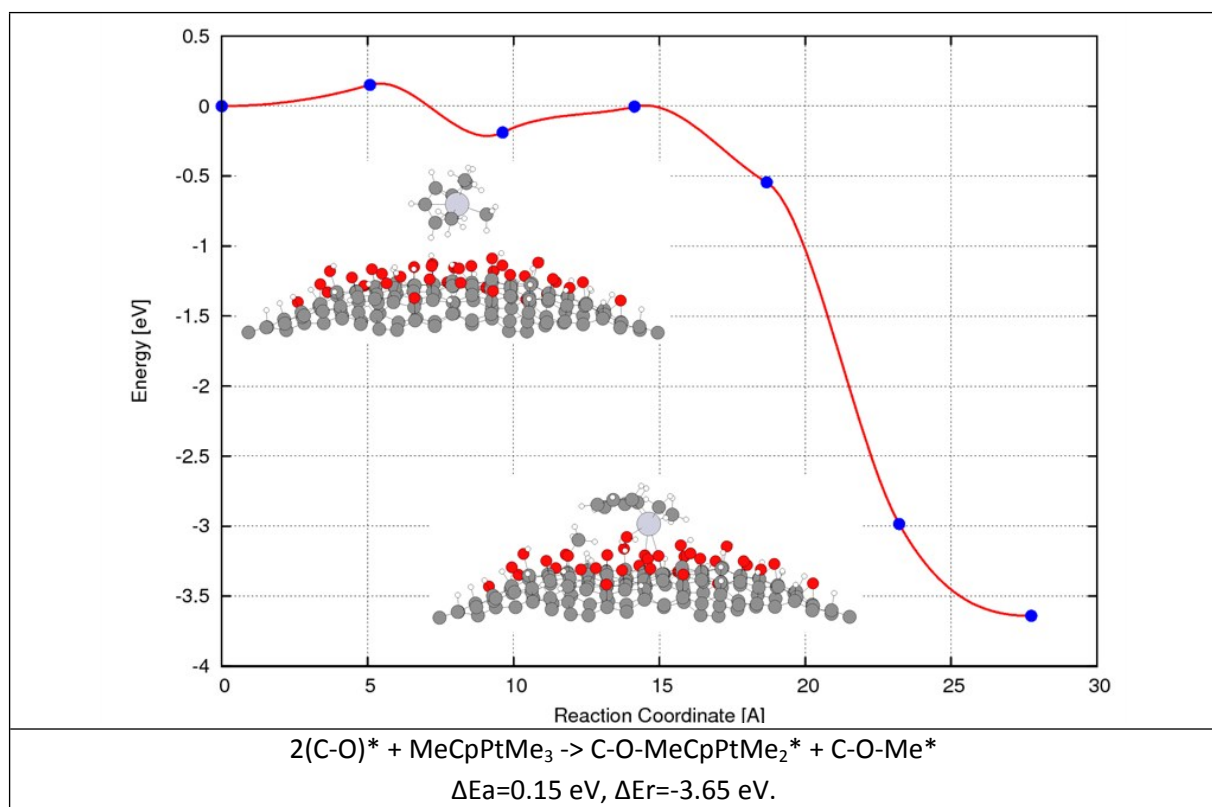

**Figure S5.** Minimum energy path of MeCpPtMe<sub>3</sub> binding on GO mixture via methyl transfer release mechanism as predicted by PBE-D3 level of theory.

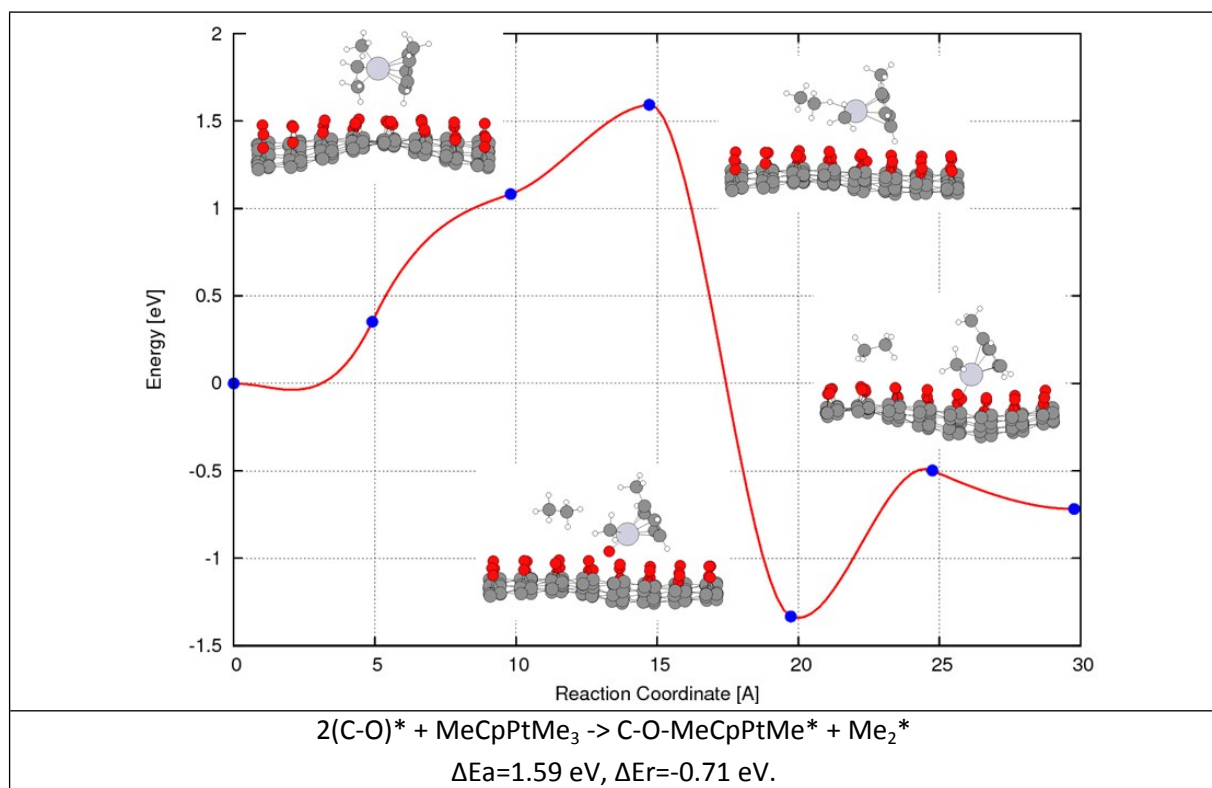

**Figure S6.** Minimum energy path of MeCpPtMe<sub>3</sub> binding on GO mixture via Me<sub>2</sub> release mechanism as predicted by PBE-D3 level of theory.

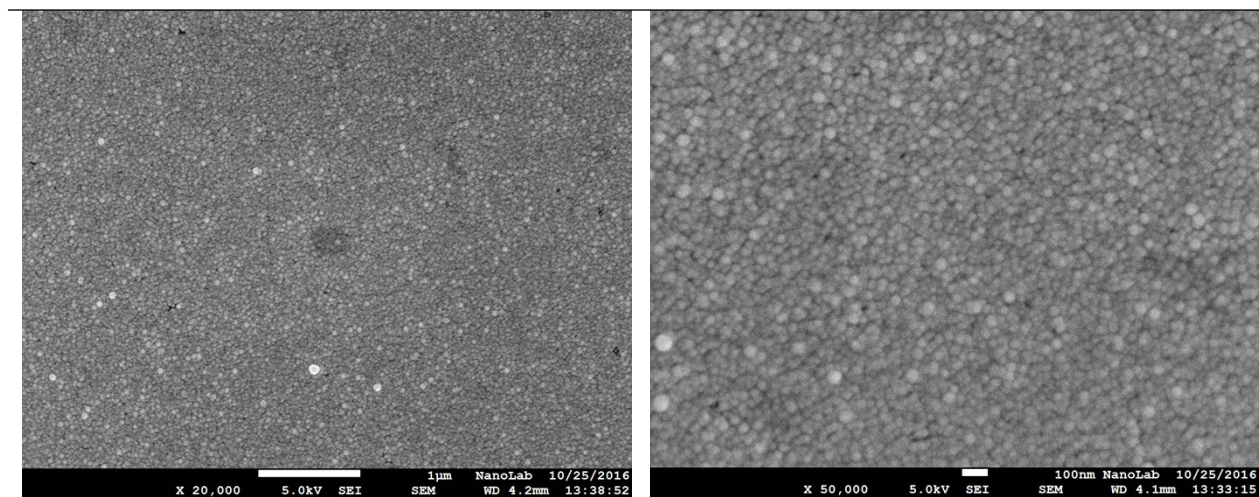

**Figure S7.** SEM images (with 20k X and 50 k X magnifications) showing the Pt ALD coverage after 1000 ALD cycles using MeCpPtMe<sub>3</sub> as the Pt precursor on graphene oxide obtained by a 5-min O<sub>2</sub> plasma treatment.
